# Supplementary material
Source: publisher figshare collection journal article supplement (https://gsapubs.figshare.com/articles/dataset/_/12531500)
Supplement: Supplementary file 1 [file 1]

## DETAILS ON METHODS

*Sampling design.* 466 dead specimens of the deposit feeder *Nuculana taphria* and the mixed deposit-feeder/chemosymbiotic *Parvilucina tenuisculpta* were sampled in sediment collected with Van Veen grabs during the Southern California Bight 2003 Regional Monitoring Program (Ranasinghe et al. 2007) (Figure DR1; Table DR1). In grabs yielding >25 specimens of a species, we assigned a unique number to each specimen and then randomly selected 25 specimens per species per grab. Six empty shells of *Nuculana taphria* from two shelf sites at 89 m (Stebbins et al. 2004) were used to calibrate the rate of AAR using  $^{14}\text{C}$  dating (Table DR2). We pooled the sites into regional single-species assemblages corresponding to 4 continental shelf segments (Fig. DR1). *Parvilucina* populations were high in the early 1970s on the Palos Verdes shelf but quickly declined in the mid-1980s (LACSD 2012).

*Details on shell storage, screening, and AAR procedure.* All empty shells plus one live-collected specimen of *Parvilucina tenuisculpta* and one live-collected specimen of *Nuculana elenensis* (a congener of *N. taphria*) had been stored in ethanol for 2 years, after initial exposure of ~2 days to buffered formalin (Ranasinghe et al. 2007). After decanting the ethanol, the shells were air-dried and stored at the University of Chicago. The live-collected specimens were articulated, with (dried) soft-tissue inside, and received the same treatment as the empty shells.

Shells were analyzed for amino acid racemization (AAR) at Northern Arizona University following Kaufman and Manley (1998). Each valve was split in two, and anterior portions of valves, whenever possible (some valves were too small), were analyzed. The posterior portions of a subset of specimens were used for AMS  $^{14}\text{C}$  dating. Specimens were sonicated for ~4 minutes, leached 20-30% by weight with a 2M solution of HCl. Four screening procedures (Kosnik and Kaufman, 2008) were used to detect aberrant specimens, defined as lying outside the 0.997 quantile (Fig. DR2). Specimens were tested for strength of correlation between (1) serine concentrations (standardized by the concentration of glutamic acid) and aspartic acid D/L<sup>c</sup>, (2) serine concentration (standardized by the concentration of aspartic acid) and glutamic acid D/L<sup>c</sup>, (3) total concentrations of aspartic acid and glutamic acid, and (4) aspartic acid D/L<sup>c</sup> and glutamic acid D/L. Six shells were flagged as outliers, but on <3 methods, thus all were used.

*Radiocarbon ages for calibration of AAR ratios.* Following standard procedures, 8 specimens of *Parvilucina tenuisculpta* and 11 of *Nuculana taphria* were selected for AMS  $^{14}\text{C}$  dating at the NOSAMS facility, Woods Hole (Table DR2). To avoid contamination, ~30% of the outer shell mass was removed prior to analysis. Two *Parvilucina* and 1 *Nuculana* yielded post-bomb  $^{14}\text{C}$  ages. Radiocarbon ages were converted to calendar years using Calib6.0 (Stuiver and Reimer 1993), using the Marine04 data (Hughen et al. 2004). A regional marine reservoir correction ( $\Delta R$ ) was determined to be 234 years (standard deviation = 96) on the basis of the  $^{14}\text{C}$  age of 12 samples from southern California in the Marine Reservoir Correction Database ([calib.qub.ac.uk/marine](http://calib.qub.ac.uk/marine)). The calendar age corresponds to the median of the age probability function, and the uncertainty to the  $2\sigma$  age range. Calib6.0 does not calibrate marine samples when conventional age minus  $\Delta R$  is less than 460  $^{14}\text{C}$  yr BP. All ages are calibrated relative to

AD 2003, the year of collection. The analytical error expressed by two standard deviations spans from 171 to 553 years (mean = 293 years, standard deviation = 113 years).

To estimate ages from AAR, the D/L values were raised to a power-law exponent  $e$  estimated with numerical optimization that simultaneously minimized (1) differences between the measured  $^{14}\text{C}$  age and age predicted by the linear relationship between  $\text{D/L}^e$  and the calibrated  $^{14}\text{C}$  age, divided by the measured  $^{14}\text{C}$  age, and (2) differences between age estimates derived from aspartic and glutamic acid, divided by the measured  $^{14}\text{C}$  age (Fig. DR2-4, Table DR3). By minimizing proportional residuals, the calibrations equally minimize the regression errors associated with young and old ages. The calibration curves were constrained to pass through the origin. The D/L of live-collected specimens was used as the D/L value for zero age. The shell ages are computed as  $b*([\text{D/L}]^e - [\text{D/L}]_{\text{alive}}^e)$ , where  $b$  is a slope,  $e$  a power-law exponent. The mean calibrated AAR age (averaged over the amino acids), weighted by the inverse of the standard error of the age squared, and the error in the weighted mean are computed according to Bevington and Robinson (1992, equations 4.17 and 4.19; Kosnik et al. 2013).

*Statistical analyses.* When predicting the median and range under a combination of model parameters, we truncate the distributions at 25,000 years, a liberal estimate for the last glacial maximum, and a possible age of some shells at the shelf-slope break, if the break was not fully exposed at lowstand. We calculate confidence intervals on median and range using a bootstrapping approach with 5,000 iterations, following Kowalewski et al. (1998; Krause et al. 2010).

## References

- Bemis, B.E., Spero, H.J., and Thunell, R.C., 2002, Using species-specific paleotemperature equations with foraminifera: a case study in the Southern California Bight. *Marine Micropaleontology*, v. 46, p. 405-430.
- Bergen, M., Weisberg, S.B., Cadien, D., Dalkey, A., Montagne, D., Smith, R.W., Stull, J.K., and Velarde, R.G., 1998, Southern California Bight 1994 Pilot Project: IV. Benthic Infauna. Southern California Coastal Water Research Project, Westminster, CA., 260 p.
- Bevington, P.R., and Robinson, D.K., 1992, Data reduction and error analysis for the physical sciences. Third edition, McGraw Hill, Boston.
- Hughen, K.A., Baillie, M.G.L., Bard, E., Bayliss, A., Beck, J.W., Bertrand, C.J.H., Blackwell, P.G., Buck, C.E., Burr, G.S., Cutler, K.B., Damon, P.E., Edwards, R.L., Fairbanks, R.G., Friedrich, M., Guilderson, T.P., Kromer, B., McCormac, F.G., Manning, S.W., Bronk Ramsey, C., Reimer, P.J., Reimer, R.W., Remmele, S., Southon, J.R., Stuiver, M., Talamo, S., Taylor, F.W., van der Plicht, J., and Weyhenmeyer, C.E., 2004, Marine04 Marine radiocarbon age calibration, 26 - 0 ka BP: *Radiocarbon*, v. 46, p. 1059-1086.
- Kaufman, D.S., and Manley, W.F., 1998, A new procedure for determining DL amino acid ratios in fossils using reverse phase liquid chromatography: *Quaternary Science Reviews*, v. 17, p. 987-1000.
- Kosnik, M.A., and Kaufman, D.S., 2008, Identifying outliers and assessing the accuracy of amino acid racemization measurements for geochronology: II. Data screening: *Quaternary Geochronology*, v. 3, p. 328-341.

- Kosnik, M.A., Kaufman, D.S., and Hua, Q., 2013, Radiocarbon-calibrated multiple amino acid geochronology of Holocene molluscs from Bramble and Rib reefs (Great Barrier Reef): *Quaternary Geochronology*, v. 16, p. 73-86.
- Kowalewski, M., Goodfriend, G.A., and Flessa, K.W., 1998, High resolution estimates of temporal mixing within shell beds: the evils and virtues of time-averaging: *Paleobiology*, v. 24, p. 287-304.
- Krause, R.A., Jr., Barbour, S.L., Kowalewski, M., Kaufman, D.S., Romanek, C.S., Simoes, M.G., and Wehmiller, J.F., 2010, Quantitative estimates and modeling of time averaging in bivalve and brachiopod shell accumulations: *Paleobiology*, v. 36, p. 428-452.
- LACSD (Los Angeles County Sanitation Districts), 2012, Joint Water Pollution Control Plant Biennial Receiving Water Monitoring Report 2010-2011. Whittier, CA: LACSD, Ocean Monitoring and Research Group, Technical Services Department, p. 1-154.
- Nardin, T.R., Osborne, R.H., Bottjer, D.J., and Scheidemann, R.C., 1981, Holocene sea-level curves for Santa Monica Shelf, Southern California Borderland. *Science*, v. 213, p. 331-333.
- Ohman, M.D., and Venrick, E.L., 2003, CalCOFI in a Changing Ocean. *Oceanography*, v. 16, p. 76-85.
- Ranasinghe, J.A., Montagne, D.E., Smith, R.W., Mikel, T., Weisberg, S.B., Cadien, D., Velarde, R., and Dalkey, A., 2003, Southern California Bight 1998 Regional Monitoring Program: VII. Benthic Macrofauna. Southern California Coastal Water Research Project, Westminster, CA, p. 1-91.
- Ranasinghe, J.A., Barnett, A.M., Schiff, K., Montagne, D.E., Brantley, C., Beegan, C., Cadien, D.B., Cash, C., Deets, G.B., Diener, D.R., Mikel, T.K., Smith, R.W., Velarde, R.G., Watts, S.D., and Weisberg, S.B., 2007, Southern California Bight 2003 Regional Monitoring Program: III. Benthic Macrofauna. Southern California Coastal Water Research Project. Costa Mesa, CA, p. 1-44.
- Ranasinghe, J.A., Schiff, K.C., Brantley, C.A., Lovell, L.L., Cadien, D.B., Mikel, T.K., Velarde, R.G., Holt, S., and Johnson, S.C., 2012, Southern California Bight 2008 Regional Monitoring Program: VI. Benthic Macrofauna. Southern California Coastal Water Research Project. Costa Mesa, CA, p. 1-71.
- Stebbins, T.D., Schiff, K.C., and Ritter, K., 2004, San Diego Sediment Mapping Study: Workplan for Generating Scientifically Defensible Maps of Sediment Conditions in the San Diego Region. City of San Diego, Metropolitan Wastewater Department, Environmental Monitoring and Technical Services Division, and Southern California Coastal Water Research Project, Westminster, CA, p. 1-11.
- Stuiver, M., and Reimer, P.J., 1993, Extended  $^{14}\text{C}$  database and revised CALIB 3.0 C age calibration program: *Radiocarbon*, v. 35, p. 215-230.
- Thompson, B., Tsukada, D., and O'Donohue, D., 1993, 1990 Reference Site Survey. Southern California Coastal Water Research Project (SCCWRP), Technical Report #269, p. 1-105. 7171 Fenwick Lane, Westminster, CA 92683.

## Codes in the R language for fitting the Weibull and two-phase model with age data:

```
#####  
#RIGHT-CENSORED WEIBULL PDF  
#age - vector with postmortem shell ages in a death assemblage  
#theta - logged model parameters  
#lp is r in the Weibull density  
#cp is k in the Weibull density  
weibull=function(theta, age) {  
  logf = function(age, lp, cp) {  
    C<-(1/lp)*gamma(1+1/cp)  
    lik<-(1/C)*exp(-(lp*age)^cp)  
    lik=log(lik)  
    age=age  
    lp=exp(theta[1])  
    cp=exp(theta[2])  
    norm=norm  
  }  
  return(-sum(logf(age, lp, cp)))  
}  
  
#optim() function can be used for parameter estimation  
#start1=c(log(0.0005),log(1))  
#optim(par=start1, fn=nweibull, age, gr=NULL)  
  
#####  
# RIGHT-CENSORED RANDOM-TIME TWO-PHASE EXPONENTIAL PDF  
#X - vector with postmortem shell ages in a death assemblage  
#out$tau is tau - burial from TAZ to SZ (or stabilization)  
#out$lambda1 is lambda 1 - rate of disintegration in TAZ  
#out$lambda2 is lambda 2 - rate of disintegration in SZ and/or removal from SZ  
  
FitExpMix=function(X,niters=10000,a=2,b=0.001,rmean=mean(X)){  
  ## prior on beta=Beta(a,a); posterior = Beta(a+N1,a+N2)  
  ## prior on r1 & r2 =Gamma(b,1/(rmean*b)); posterior = Gamma(b+n,1/(rmean*b+mean(X1 or  
  ##X2)*n))  
  N=length(X)  
  d=function(x){  
    r1*exp(-r1*x)*beta+r2*exp(-r2*x)*(1-beta)  
  }  
  beta=0.5;  
  r1=1;  
  r2=1;  
  best=c(beta,r1,r2);  
  dbest=sum(log(d(X)))  
  cluster=rbinom(N,1,beta);
```

```

c=which(cluster==1)
for(iter in 1:niters){
  beta=rbeta(1,a+length(c),a+N-length(c))
  r1=rgamma(1,b+length(c),rate=rmean*b+sum(X[c]));
  r2=rgamma(1,b+N-length(c),rate=rmean*b+sum(X[-c]))
  L1=beta*r1*exp(-r1*X)
  L2=(1-beta)*r2*exp(-r2*X)
  cluster=rbinom(N,1,L1/(L1+L2));
  c=which(cluster==1)
  dnew=sum(log(d(X)));
  if(dnew>dbest){dbest=dnew;best=c(beta,r1,r2)}
}

beta=best[1];
r1=best[2];
r2=best[3]
if(r1>r2) {beta=1-beta;r1temp=r1;r1=r2;r2=r1temp}
out=list();out$beta=beta;out$r1=r1;out$r2=r2
## convert parameters
out$alpha=(beta*r1)/(beta*r1+(1-beta)*r2)
out$tau=out$alpha*(r2-r1);out$lambda1=r2-out$tau;out$lambda2=r1
out$lik=dbest
out
}

##Approximate computation of completeness, assuming steady-state production since the last
##glacial maximum (~20,000 years).
production=seq(0,20000,by=1)
#one-phase model with estimate of lambda
survived=exp(-lambda*production)
#Weibull model with estimate of r and k
survived=exp(-(r*production)^k)
#2-phase model with estimate of lambda 1, lambda2, tau
#alpha=tau/(lambda1+tau-lambda2)
survived=exp(-lambda2*production)*alpha+exp(-(lambda1+tau)*production)*(1-alpha)
completeness=sum(survived)/max(production)

```

Table DR1 – Coordinates and water depths of 18 sites with *Nuculana taphria* and *Parvilucina tenuisculpta*. Site ID numbers are those of the Bight'03 survey, which is also the source of data on numbers of living individuals. Partitioning sites into four regional single-species assemblages (Santa Barbara Shelf, Palos Verdes Shelf, San Pedro Shelf, and San Diego Shelf) reduces the depth range per assemblage to <20 m (with the exception of *Parvilucina tenuisculpta* from the Palos Verdes Shelf, 44 m depth range).

| Site ID | Region             | Sediment type | Depth (m) | Year of sampling | Longitude   | Latitude  | %sand | Grab penetration (cm) | Species                | Abundance alive | Number of dated shells |
|---------|--------------------|---------------|-----------|------------------|-------------|-----------|-------|-----------------------|------------------------|-----------------|------------------------|
| 4042    | Palos Verdes Shelf | muddy sand    | 28        | 2003             | -118.296191 | 33.695483 | 66.76 | 14                    | <i>N. taphria</i>      | 1               | 20                     |
| 4170    | Palos Verdes Shelf | muddy sand    | 25        | 2003             | -118.303776 | 33.698482 | 78.98 | 11                    | <i>N. taphria</i>      | 1               | 5                      |
| 4047    | San Barbara Shelf  | muddy sand    | 24.7      | 2003             | -119.66209  | 34.3956   | 68.86 | 12.5                  | <i>N. taphria</i>      | 0               | 25                     |
| 4267    | San Barbara Shelf  | mud           | 30.6      | 2003             | -119.43346  | 34.31313  | 8.41  | 15                    | <i>N. taphria</i>      | 6               | 10                     |
| 4058    | San Pedro Shelf    | muddy sand    | 28        | 2003             | -118.079117 | 33.642617 | 76.79 | 7                     | <i>N. taphria</i>      | 1               | 10                     |
| 4090    | San Pedro Shelf    | muddy sand    | 29        | 2003             | -118.130697 | 33.659615 | 74.43 | 12                    | <i>N. taphria</i>      | 1               | 10                     |
| 4122    | San Pedro Shelf    | muddy sand    | 48        | 2003             | -118.140479 | 33.604468 | 80.24 | 8                     | <i>N. taphria</i>      | 1               | 16                     |
| 4137    | San Pedro Shelf    | muddy sand    | 57        | 2003             | -118.011507 | 33.576949 | 82.62 | 7                     | <i>N. taphria</i>      | 0               | 15                     |
| 4265    | San Pedro Shelf    | muddy sand    | 40        | 2003             | -118.026628 | 33.591817 | 73.62 | 8                     | <i>N. taphria</i>      | 0               | 25                     |
| 4290    | San Pedro Shelf    | sandy mud     | 23        | 2003             | -118.184554 | 33.711698 | 46.51 | 16                    | <i>N. taphria</i>      | 5               | 25                     |
| 4362    | San Pedro Shelf    | muddy sand    | 51        | 2003             | -118.248063 | 33.637183 | 70.62 | 11                    | <i>N. taphria</i>      | 0               | 25                     |
| 4369    | San Pedro Shelf    | muddy sand    | 56        | 2003             | -117.984603 | 33.575269 | 78.22 | 8                     | <i>N. taphria</i>      | 0               | 10                     |
| 4036    | San Diego Shelf    | muddy sand    | 48        | 2003             | -117.305167 | 32.796183 | 63.23 | 12.5                  | <i>N. taphria</i>      | 1               | 25                     |
| 4244    | San Diego Shelf    | sandy mud     | 57        | 2003             | -117.282    | 32.682217 | 49.69 | 11                    | <i>N. taphria</i>      | 1               | 5                      |
| 4248    | San Diego Shelf    | sandy mud     | 58        | 2003             | -117.281567 | 32.679167 | 49.88 | 10                    | <i>N. taphria</i>      | 2               | 7                      |
| 4042    | Palos Verdes Shelf | muddy sand    | 28        | 2003             | -118.296191 | 33.695483 | 66.76 | 14                    | <i>P. tenuisculpta</i> | 1               | 6                      |
| 4070    | Palos Verdes Shelf | sandy mud     | 72        | 2003             | -118.446191 | 33.758516 | 39.6  | 15                    | <i>P. tenuisculpta</i> | 0               | 25                     |
| 4170    | Palos Verdes Shelf | muddy sand    | 25        | 2003             | -118.303776 | 33.698482 | 78.98 | 11                    | <i>P. tenuisculpta</i> | 3               | 15                     |
| 4326    | Palos Verdes Shelf | muddy sand    | 41        | 2003             | -118.423747 | 33.742965 | 56.13 | 14                    | <i>P. tenuisculpta</i> | 3               | 26                     |
| 4119    | San Barbara Shelf  | muddy sand    | 18.8      | 2003             | -119.843311 | 34.400081 | 89.14 | 8.5                   | <i>P. tenuisculpta</i> | 1               | 25                     |
| 4090    | San Pedro Shelf    | muddy sand    | 29        | 2003             | -118.130697 | 33.659615 | 74.43 | 12                    | <i>P. tenuisculpta</i> | 1               | 4                      |
| 4122    | San Pedro Shelf    | muddy sand    | 48        | 2003             | -118.140479 | 33.604468 | 80.24 | 8                     | <i>P. tenuisculpta</i> | 0               | 10                     |
| 4137    | San Pedro Shelf    | muddy sand    | 57        | 2003             | -118.011507 | 33.576949 | 82.62 | 7                     | <i>P. tenuisculpta</i> | 3               | 25                     |
| 4234    | San Pedro Shelf    | sand          | 34        | 2003             | -118.264827 | 33.671651 | 96.54 | 7                     | <i>P. tenuisculpta</i> | 1               | 50                     |
| 4265    | San Pedro Shelf    | muddy sand    | 40        | 2003             | -118.026628 | 33.591817 | 73.62 | 8                     | <i>P. tenuisculpta</i> | 2               | 15                     |
| 4362    | San Pedro Shelf    | muddy sand    | 51        | 2003             | -118.248063 | 33.637183 | 70.62 | 11                    | <i>P. tenuisculpta</i> | 0               | 10                     |
| 4369    | San Pedro Shelf    | muddy sand    | 56        | 2003             | -117.984603 | 33.575269 | 78.22 | 8                     | <i>P. tenuisculpta</i> | 2               | 25                     |
| 4036    | San Diego Shelf    | muddy sand    | 48        | 2003             | -117.305167 | 32.796183 | 63.23 | 12.5                  | <i>P. tenuisculpta</i> | 0               | 15                     |
| 4244    | San Diego Shelf    | sandy mud     | 57        | 2003             | -117.282    | 32.682217 | 49.69 | 11                    | <i>P. tenuisculpta</i> | 4               | 10                     |

Table DR2 – Radiocarbon and amino acid racemization data used to generate AAR calibration curves. Note: sd = standard deviation; Asp = aspartic acid; Glu = glutamic acid.

| Specimen code | Species                         | Collected | Water depth (m) | <sup>14</sup> C age (yr BP) | Age error (yr) | Calibrated age (years before 2003) | Calibrated age uncertainty (one-half of 2 sigma range) | D/L Asp | D/L Glu | Site ID | NOSAMS accession number |
|---------------|---------------------------------|-----------|-----------------|-----------------------------|----------------|------------------------------------|--------------------------------------------------------|---------|---------|---------|-------------------------|
| NT4042-13     | <i>Nuculana taphria</i>         | Dead      | 28              | 980                         | 30             | 430                                | 183                                                    | 0.122   | 0.040   | 4042    | OS-77178                |
| NT4042-2      | <i>Nuculana taphria</i>         | Dead      | 28              | 1000                        | 25             | 446                                | 171                                                    | 0.159   | 0.048   | 4042    | OS-77177                |
| NT4170-2      | <i>Nuculana taphria</i>         | Dead      | 25              | 2000                        | 30             | 1373                               | 218                                                    | 0.227   | 0.075   | 4170    | OS-77176                |
| NT4265-8      | <i>Nuculana taphria</i>         | Dead      | 40              | 4170                        | 30             | 3980                               | 281                                                    | 0.275   | 0.085   | 4265    | OS-77180                |
| NT41-3        | <i>Nuculana taphria</i>         | Dead      | 89              | 13850                       | 75             | 15701                              | 463                                                    | 0.330   | 0.097   | 41      | OS-74071                |
| NT41-4        | <i>Nuculana taphria</i>         | Dead      | 89              | 17050                       | 130            | 19640                              | 339                                                    | 0.462   | 0.159   | 41      | OS-74072                |
| NT41-15       | <i>Nuculana taphria</i>         | Dead      | 89              | 14950                       | 75             | 17199                              | 553                                                    | 0.429   | 0.138   | 41      | OS-74160                |
| NT41-20       | <i>Nuculana taphria</i>         | Dead      | 89              | 2270                        | 45             | 1659                               | 246                                                    | 0.241   | 0.073   | 41      | OS-77191                |
| NT50-14       | <i>Nuculana taphria</i>         | Dead      | 89              | 14250                       | 75             | 16248                              | 480                                                    | 0.444   | 0.140   | 50      | OS-74075                |
| NT50-5        | <i>Nuculana taphria</i>         | Dead      | 89              | 11250                       | 55             | 12664                              | 300                                                    | 0.372   | 0.110   | 50      | OS-74074                |
| PT4119-1      | <i>Parvilucina tenuisculpta</i> | Dead      | 18.8            | 3440                        | 30             | 3075                               | 254                                                    | 0.267   | 0.082   | 4119    | OS-80898                |
| PT4119-3      | <i>Parvilucina tenuisculpta</i> | Dead      | 18.8            | 2370                        | 35             | 1773                               | 246                                                    | 0.208   | 0.064   | 4119    | OS-80909                |
| PT4362-9      | <i>Parvilucina tenuisculpta</i> | Dead      | 51              | 935                         | 30             | 394                                | 204                                                    | 0.100   | 0.028   | 4362    | OS-80901                |
| PT4119-5      | <i>Parvilucina tenuisculpta</i> | Dead      | 18.8            | 2340                        | 50             | 1739                               | 260                                                    | 0.245   | 0.072   | 4119    | OS-80910                |
| PT4042-2      | <i>Parvilucina tenuisculpta</i> | Dead      | 28              | 805                         | 45             | 251                                | 200                                                    | 0.097   | 0.031   | 4042    | OS-81023                |
| PT4369-15     | <i>Parvilucina tenuisculpta</i> | Dead      | 56              | 9380                        | 45             | 9966                               | 296                                                    | 0.305   | 0.112   | 4369    | OS-80902                |
| NT50-9        | <i>Nuculana taphria</i>         | Dead      | 89              | >Modern                     | NA             | NA                                 | NA                                                     | 0.069   | 0.031   | 50      | OS-76150                |
| PT4170-7      | <i>Parvilucina tenuisculpta</i> | Dead      | 25              | >Modern                     | NA             | NA                                 | NA                                                     | 0.092   | 0.039   | 4170    | OS-80440                |
| PT4119-11     | <i>Parvilucina tenuisculpta</i> | Dead      | 18.8            | >Modern                     | NA             | NA                                 | NA                                                     | 0.105   | 0.041   | 4119    | OS-80438                |
| NE41          | <i>Nuculana elenensis</i>       | Live      | 89              | NA                          | NA             | 0                                  | NA                                                     | 0.056   | 0.020   | 41      | NA                      |
| PT4326-26     | <i>Parvilucina tenuisculpta</i> | Live      | 41              | NA                          | NA             | 0                                  | NA                                                     | 0.062   | 0.020   | 4326    | NA                      |

Table DR3 – Calibration statistics for the rate of amino acid racemization (AAR) based on paired AAR and  $^{14}\text{C}$  analyses of two mollusc species. These define a regression line, where the expected age in calendar years (before AD 2003) corresponds to  $\text{slope} \times (\text{D/L})^{\text{exponent}}$ , with a y-intercept of zero.  $n$  = the number of specimens used for calibration, Adj.R2 = the adjusted coefficient of determination showing the fit strength; SE = mean standard error for shell ages younger than 500 years, 500-5,000 years, and older than 5,000 years. Shells < 500 years old have standard error < 20 years, shells 500-5,000 years old have standard error between 108 and 383 years, and shells > 5,000 years old have standard error between 437-1,162 years.

|                                 | Amino acid    | $n$ | Intercept | Slope   | Exponent | Adj. R2 | SE (0-500y) | SE (500-5000y) | SE (>5000y) |
|---------------------------------|---------------|-----|-----------|---------|----------|---------|-------------|----------------|-------------|
| <i>Parvilucina tenuisculpta</i> | aspartic acid | 6   | 0         | 919323  | 4.004    | 0.910   | 4           | 422            | 1185        |
| <i>Parvilucina tenuisculpta</i> | glutamic acid | 6   | 0         | 5920942 | 2.942    | 0.985   | 5           | 105            | 411         |
| <i>Nuculana taphria</i>         | aspartic acid | 9   | 0         | 331576  | 3.576    | 0.980   | 3           | 108            | 430         |
| <i>Nuculana taphria</i>         | glutamic acid | 9   | 0         | 9208343 | 3.260    | 0.931   | 11          | 197            | 775         |



Table DR4 – Estimated parameters of three probability density functions with negative log-likelihoods, the Akaike Information Criterion corrected for small sample size (AICc),  $\Delta$ AIC, and Akaike weights (the probability that the given model is the best relative to the other models) for single-species assemblages at the regional scale. Given the data, the models with the Akaike weights exceeding 0.8 (in bold) imply that they are four (or more) times more likely than other models.

|                    | <i>P. tenuisculpta</i> -Santa Barbara | <i>P. tenuisculpta</i> -Palos Verdes | <i>P. tenuisculpta</i> -San Pedro | <i>P. tenuisculpta</i> -San Diego | <i>N. taphria</i> -Santa Barbara | <i>N. taphria</i> -Palos Verdes | <i>N. taphria</i> -San Pedro | <i>N. taphria</i> -San Diego |
|--------------------|---------------------------------------|--------------------------------------|-----------------------------------|-----------------------------------|----------------------------------|---------------------------------|------------------------------|------------------------------|
| 1-phase rate       | 0.0025                                | 0.0088                               | 0.0013                            | 0.0008                            | 0.0007                           | 0.0014                          | 0.0003                       | 0.0012                       |
| Weibull rate       | 80                                    | 0.0939                               | 46                                | 36521                             | 192348                           | 0.0013                          | 933962                       | 14158                        |
| Weibull shape      | 0.19                                  | 0.46                                 | 0.19                              | 0.13                              | 0.12                             | 1.07                            | 0.11                         | 0.14                         |
| 2-phase rate 1     | 0.0192                                | 0.0199                               | 0.0222                            | 0.0287                            | 0.0669                           | 0.0014                          | 0.1255                       | 0.1191                       |
| 2-phase rate 2     | 0.00058                               | 0.00098                              | 0.00028                           | 0.00021                           | 0.00021                          | 0.0014                          | 0.00021                      | 0.00062                      |
| Sequestration rate | 0.00014                               | 0.00007                              | 0.00007                           | 0.00007                           | 0.00008                          | 7E-07                           | 0.00042                      | 0.00067                      |
| 1-phase -LogLik    | 174.3                                 | 407.4                                | 861                               | 202.6                             | 288                              | 189.2                           | 1238.3                       | 278.9                        |
| Weibull -LogLik    | 150.5                                 | 384.3                                | 727                               | 164.3                             | 230.1                            | 189.2                           | 1161.9                       | 248.2                        |
| 2-phase -LogLik    | 150.8                                 | 375.6                                | 689.1                             | 157                               | 208.7                            | 189.2                           | 1088.8                       | 234.8                        |
| 1-phase AICc       | 350.9                                 | 816.9                                | 1724                              | 407.3                             | 578.2                            | 380.6                           | 2478.6                       | 560                          |
| Weibull AICc       | 305.5                                 | 772.7                                | 1458.2                            | 333                               | 464.7                            | 383                             | 2327.9                       | 500.7                        |
| 2-phase AICc       | 308.7                                 | 757.6                                | 1384.5                            | 321.1                             | 424.2                            | 383.8                           | 2183.8                       | 476.3                        |
| 1-phase delta AIC  | 45.4                                  | 59.3                                 | 339.5                             | 86.2                              | 154                              | 0                               | 294.7                        | 83.7                         |
| Weibull delta AIC  | 0                                     | 15.1                                 | 73.7                              | 11.9                              | 40.5                             | 2.3                             | 144.1                        | 24.4                         |
| 2-phase delta AIC  | 3.2                                   | 0                                    | 0                                 | 0                                 | 0                                | 3.1                             | 0                            | 0                            |
| 1-phase weight     | 0                                     | 0                                    | 0                                 | 0                                 | 0                                | 0.66                            | 0                            | 0                            |
| Weibull weight     | <b>0.83</b>                           | 0                                    | 0                                 | 0                                 | 0                                | 0.2                             | 0                            | 0                            |
| 2-phase weight     | 0.17                                  | <b>1</b>                             | <b>1</b>                          | <b>1</b>                          | <b>1</b>                         | 0.14                            | <b>1</b>                     | <b>1</b>                     |

Table DR5 – Estimated parameters of three probability density functions with, the Akaike Information Criterion corrected for small sample size (AICc) for single-species assemblages at the site scales, for sites with more than 15 specimens. Although such samples sizes are still small, AIC values support time-varying models, with seven of 17 local assemblages conforming to two-phase model and eight conforming to the Weibull model with  $k < 0.5$  (Table DR5).

| Species                | Sample       | Sample size | Median age | Age range | 1-phase $\lambda$ | Weibull $r$ | Weibull $k$ | 2-phase $\lambda_1$ | 2-phase $\lambda_2$ | Median time to burial (years) | 1-phase AIC  | Weibull AIC  | 2-phase AIC  |
|------------------------|--------------|-------------|------------|-----------|-------------------|-------------|-------------|---------------------|---------------------|-------------------------------|--------------|--------------|--------------|
| <i>P. tenuisculpta</i> | PT 4119-19 m | 25          | 43         | 3839      | 0.00255           | 1017.35     | 0.16        | 0.0191              | 0.00057             | 4847                          | 350.7        | <b>300.5</b> | 307.9        |
| <i>P. tenuisculpta</i> | PT 4170-25 m | 15          | 108        | 3328      | 0.00279           | 0.08        | 0.38        | 0.0077              | 0.00048             | 12437                         | 208.7        | 200.5        | <b>200.4</b> |
| <i>P. tenuisculpta</i> | PT 4234-34 m | 25          | 36         | 118       | 0.02405           | 0.01        | 1.75        | 0.0241              | 0.02405             | 43274                         | 238.6        | <b>239.5</b> | 243.4        |
| <i>P. tenuisculpta</i> | PT 4265-40 m | 15          | 114        | 4394      | 0.00124           | 20.83       | 0.2         | 0.0146              | 0.00036             | 4938                          | 233          | 214.7        | <b>212.5</b> |
| <i>P. tenuisculpta</i> | PT 4326-41 m | 25          | 30         | 213       | 0.02329           | 0.02        | 1.04        | 0.0252              | 0.01496             | 526                           | <b>240.2</b> | 242.5        | 245          |
| <i>P. tenuisculpta</i> | PT 4036-48 m | 15          | 103        | 9057      | 5e-04             | 26.14       | 0.18        | 0.0094              | 2e-04               | 5682                          | 260.6        | 240.2        | <b>232.4</b> |
| <i>P. tenuisculpta</i> | PT 4369-56 m | 25          | 28         | 9282      | 0.00138           | 59          | 0.2         | 0.0297              | 1e-04               | 56303                         | 381.5        | 294.6        | <b>264.6</b> |
| <i>P. tenuisculpta</i> | PT 4137-57 m | 25          | 28         | 57        | 0.03734           | 0.02        | 6.63        | 0.0375              | 0.03748             | 31372                         | 216.6        | <b>209.4</b> | 221.3        |
| <i>P. tenuisculpta</i> | PT 4070-72 m | 25          | 33         | 132       | 0.02301           | 0.01        | 1.75        | 0.023               | 0.02302             | 11603                         | 240.8        | <b>240.4</b> | 245.6        |
| <i>N. taphria</i>      | NT 4290-23 m | 25          | 2423       | 10310     | 0.00034           | 0.19        | 0.25        | 0.0045              | 0.00027             | 1240                          | 451.2        | 446.9        | <b>446.5</b> |
| <i>N. taphria</i>      | NT 4047-25 m | 25          | 21         | 11332     | 0.00052           | >10000      | 0.12        | 0.0156              | 0.00021             | 7267                          | 430.3        | 366.2        | <b>360.4</b> |
| <i>N. taphria</i>      | NT 4042-28 m | 20          | 412        | 2552      | 0.00154           | 0           | 0.99        | 0.0018              | 0.00144             | 619                           | <b>301.2</b> | 303.7        | 306.4        |
| <i>N. taphria</i>      | NT 4265-40 m | 25          | 1          | 3176      | 0.0028            | >10000      | 0.07        | 0.0634              | 5e-04               | 9712                          | 346.1        | <b>186.8</b> | 239.9        |
| <i>N. taphria</i>      | NT 4036-48 m | 25          | 1102       | 4498      | 0.00082           | 24.93       | 0.18        | 0.0128              | 0.00048             | 790                           | 407.4        | 394.7        | <b>392.3</b> |
| <i>N. taphria</i>      | NT 4122-48 m | 16          | 5789       | 11901     | 0.00017           | 0           | 8.24        | 2e-04               | 0.00017             | 9903491                       | 311.7        | <b>306.4</b> | 317.4        |
| <i>N. taphria</i>      | NT 4362-51 m | 25          | 5092       | 10757     | 2e-04             | 0           | 6.53        | 0.0012              | 0.00021             | 634                           | 477.3        | <b>468.7</b> | 481.4        |
| <i>N. taphria</i>      | NT 4137-57 m | 15          | 5666       | 8268      | 0.00018           | 0           | >10000      | 2e-04               | 0.00018             | 761173                        | 290.7        | <b>280.5</b> | 296.5        |

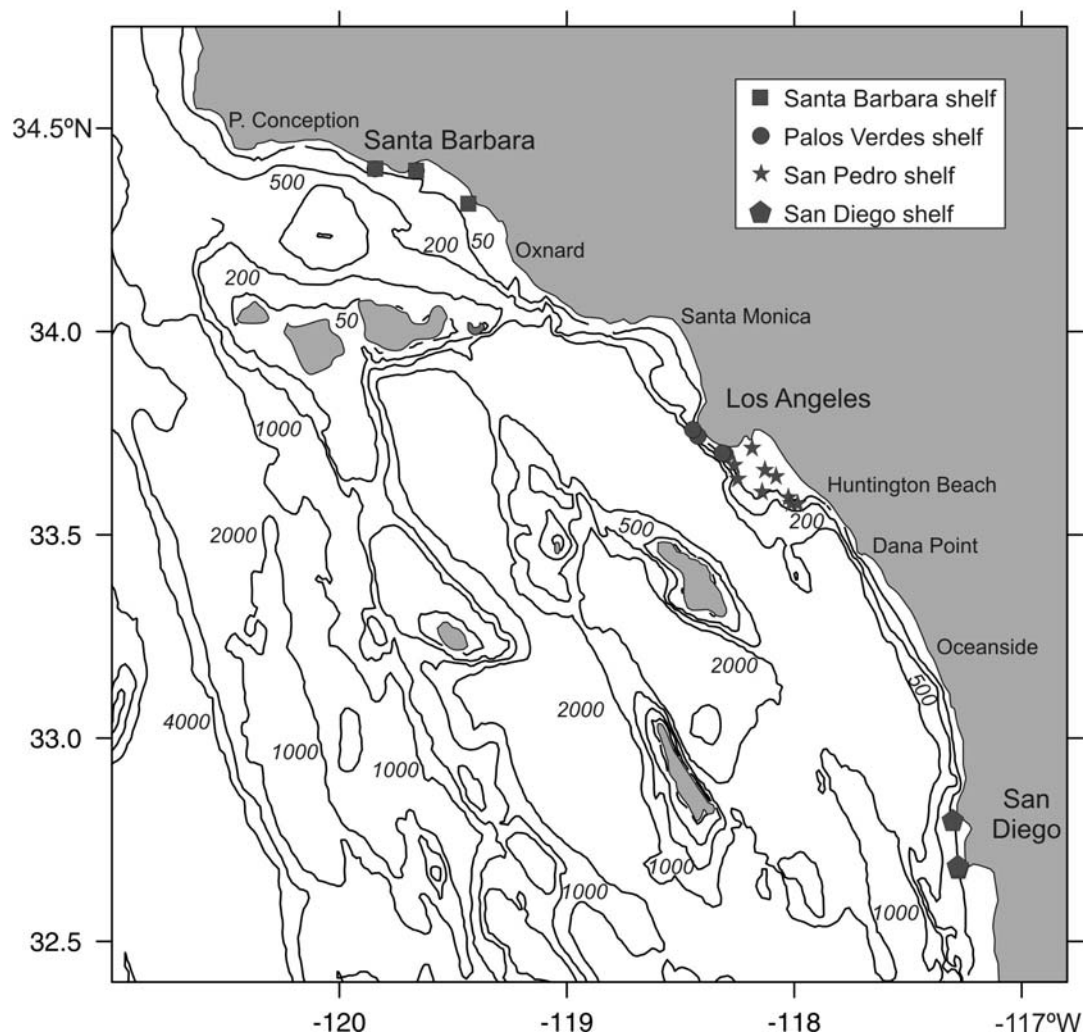

Figure DR1 – Study area and sample sites grouped by shelf segment, Southern California Bight. See Table DR1 for site information including depth range per single-species assemblage. Bathymetric contours in meters. From north to south: Santa Barbara shelf (between Point Conception and Hueneme Canyon), Palos Verdes shelf (between Redondo Canyon and San Pedro Valley), San Pedro shelf (between San Pedro Valley and Newport Canyon), and San Diego shelf (between La Jolla Canyon and US/Mexican border).

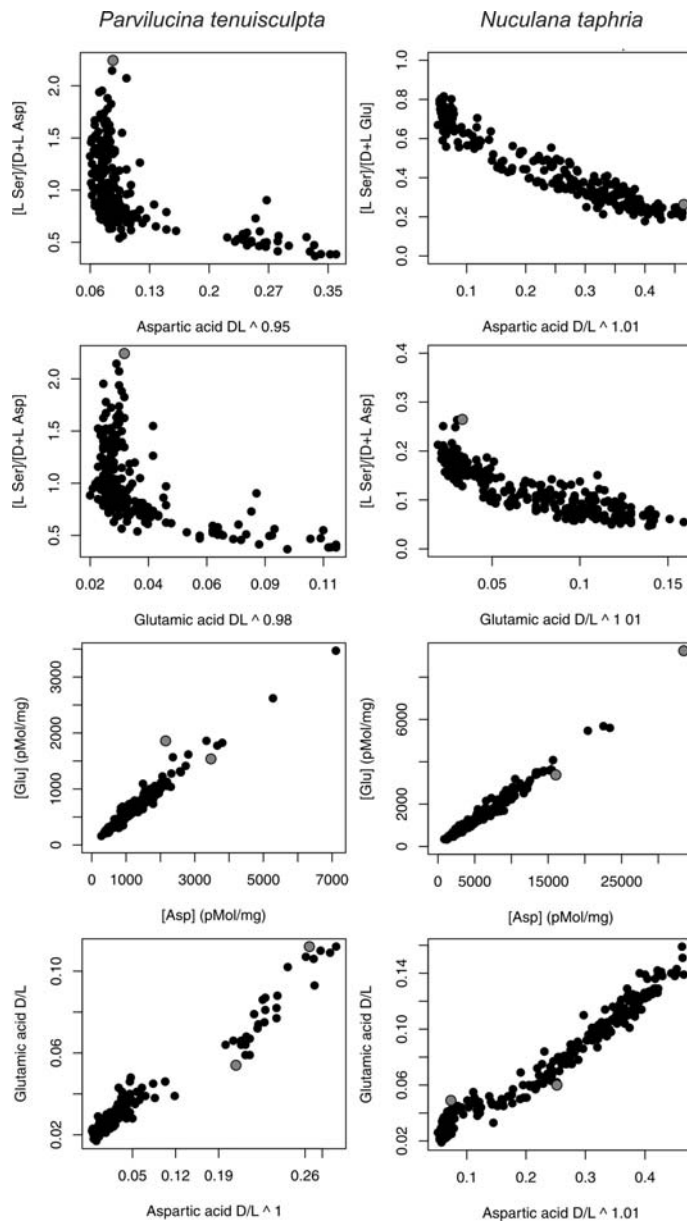

Figure DR2 –Data screening. In the first two rows, L-serine concentrations ( $[L-Ser]$ ) relative to glutamic acid concentrations ( $[D+L Glu]$ , upper row) and aspartic acid concentrations ( $[D+L Asp]$ , second row from top) are plotted against aspartic acid  $D/L^e$  and glutamic acid  $D/L^e$ , respectively. The third row shows relationships between concentrations of aspartic acid and glutamic acid. The fourth row shows best-fit exponential relationships between aspartic acid  $D/L$  and glutamic acid  $D/L$ . Specimens flagged with gray circles are outliers.

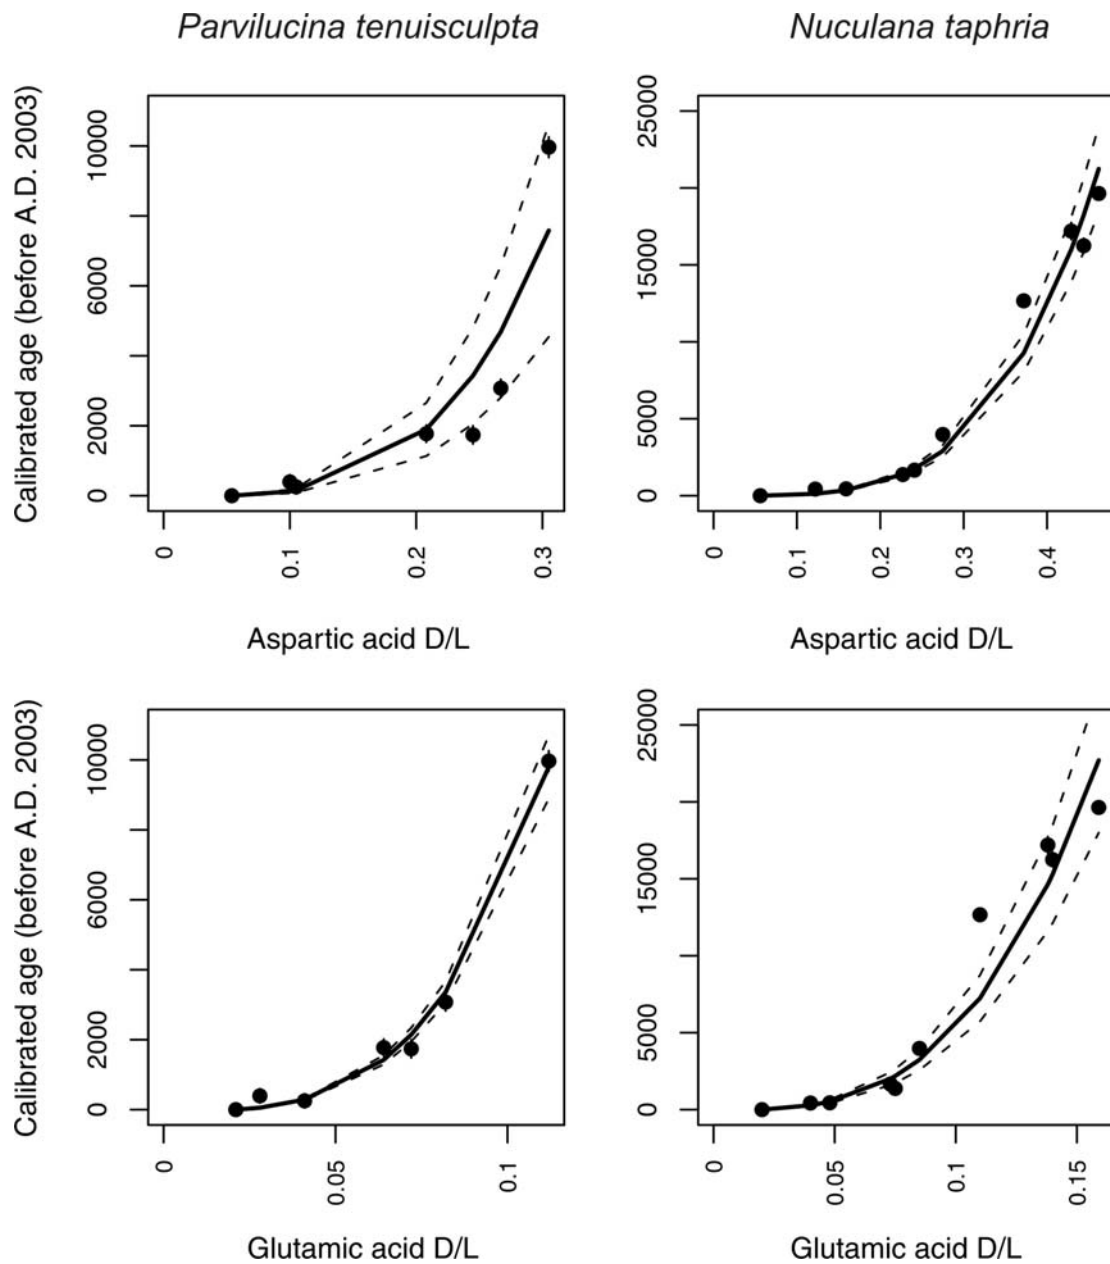

Figure DR3 - Amino acid racemization (AAR) calibration curves for *Parvilucina tenuisculpta* and *Nuculana taphria* shells dated using AMS. Gray dashed lines are 95% prediction intervals. Black vertical line associated with each shell (most are contained within the plot symbol) is the 2 $\sigma$  range of the calibrated age (Calib6.0). Raw data in Table S3.

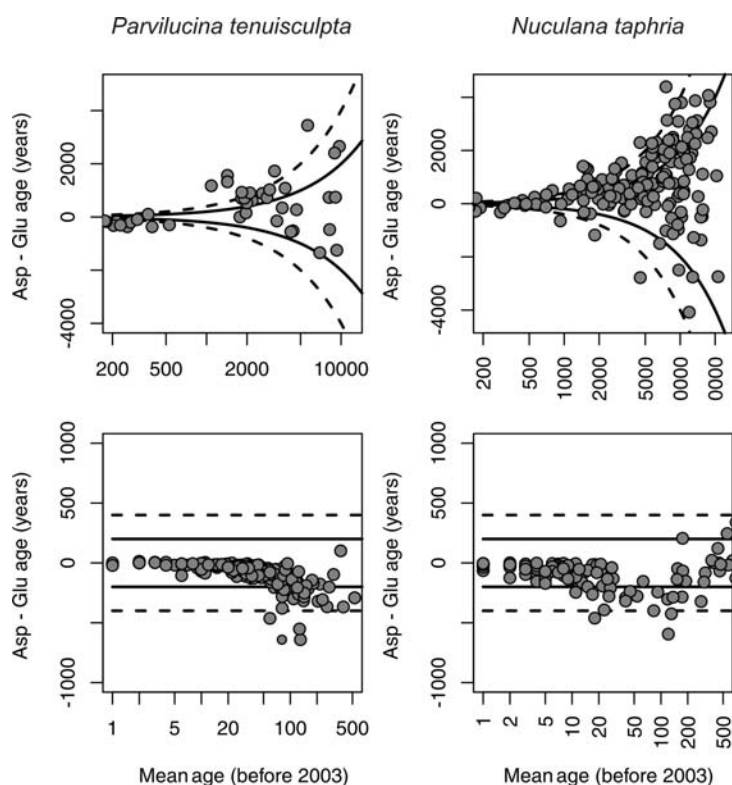

Figure DR4 – Difference in ages inferred from aspartic acid (Asp) and glutamic acid (Glu) is mostly within the range of 20% (solid line) and 40% age uncertainty (dashed line). The upper row shows *proportional* differences between ages relative to the mean age (based on the two age estimates) on the interval between 500 and maximum mean age. The lower row shows *absolute* differences between inferred ages and the mean age on the interval between minimum mean age and 2000 years. Solid lines show differences of 200 years and dashed lines represent differences of 400 years. The mean age uncertainty (averaged across shells) based on the age difference between the aspartic acid and the glutamic acid calibration is 41 years for *Parvilucina* and 59 years for *Nuculana* for shells younger than 1,000 years. The mean proportional age uncertainty is 0.32 for *Parvilucina* and 0.21 for *Nuculana* for shells younger than 1,000 years.

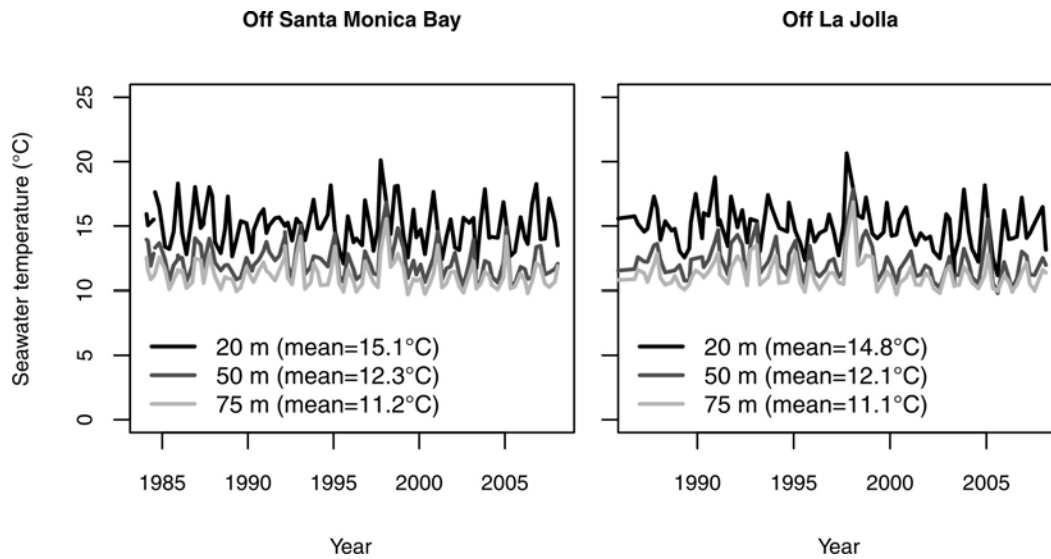

Figure DR5 - Mean bottom-water temperature today declines by  $\sim 3.5\text{--}4^{\circ}\text{C}$  over the depth range of age-dated specimens of *Parvilucina tenuisculpta* (19-72 m) and by  $\sim 3^{\circ}\text{C}$  for *Nuculana taphria* specimens (23-58 m), based on quarterly time series (Ohman and Venrick 2003). Most specimens date from the last 10,000 years; sealevel has risen slowly over this interval by only  $\sim 20$  m (Nardin et al. 1981) and temperature levels have been stable (Bemis et al. 2002). The small number of older,  $>10$  ka specimens might have been exposed initially to warmer waters at the deepest sampled sites owing to lower sealevel, leading to overestimating their ages relative to those of younger cohorts due to the temperature dependence of racemization rates. However, the entire region was colder during this initial phase of rapid sealevel rise: seawater warmed by several  $^{\circ}\text{C}$  up to its present level during the transition from glacial to interglacial 15,000-10,000 years ago (Bemis et al. 2002). Warming rather than cooling has characterized the increase in water depth experienced over the millennial scale of shell accumulation on the southern California shelf, and we thus expect stable temperatures across all sample sites during their windows of time-averaged shell accumulation.

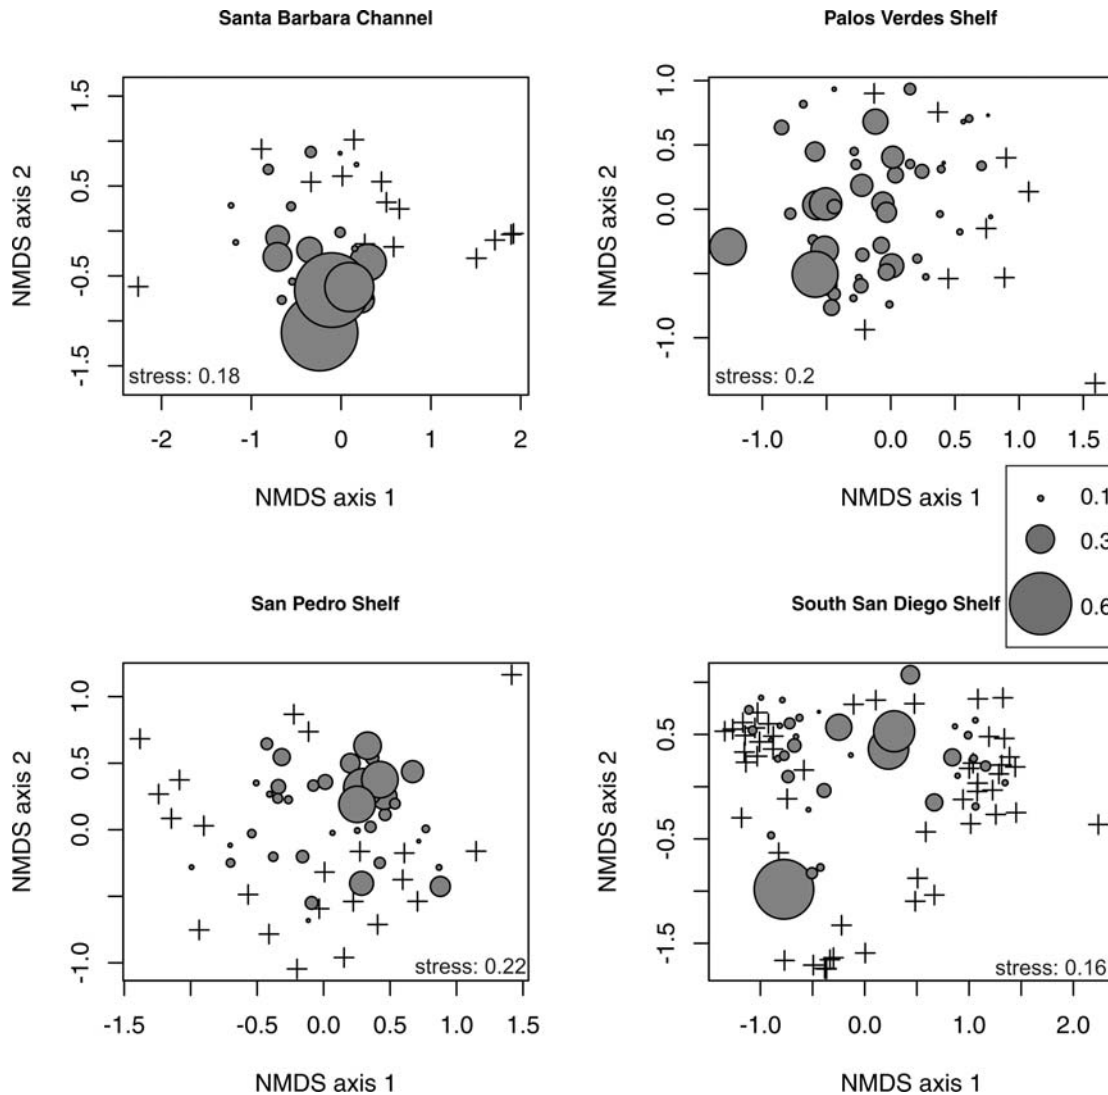

Figure DR6 –Spatial variation among sites in the proportional abundance of living individuals of *Parvilucina tenuisculpta*, showing that this species attained high living abundances in at least some sites in each of the four regions (assemblages sampled between 1990 and 2008; Thompson et al. 1993; Bergen et al. 1998; Ranasinghe et al. 2003, 2007; Stebbins et al. 2004; Ranasinghe et al. 2012). Each point in these non-metric dimensional scaling (NMDS) plots is a living multiple-species assemblage sampled at a different time or site on the seafloor from water depths <75 m between 1997 and 2008; separation of points reflects Bray-Curtis dissimilarities computed using square-root transformed proportional abundances of 150 bivalve species. Gray bubbles denote presence of *P. tenuisculpta*, with bubble diameter indicating its proportional abundance in that living assemblage. Crosses denote living assemblages that did not contain any individuals of *P. tenuisculpta*.



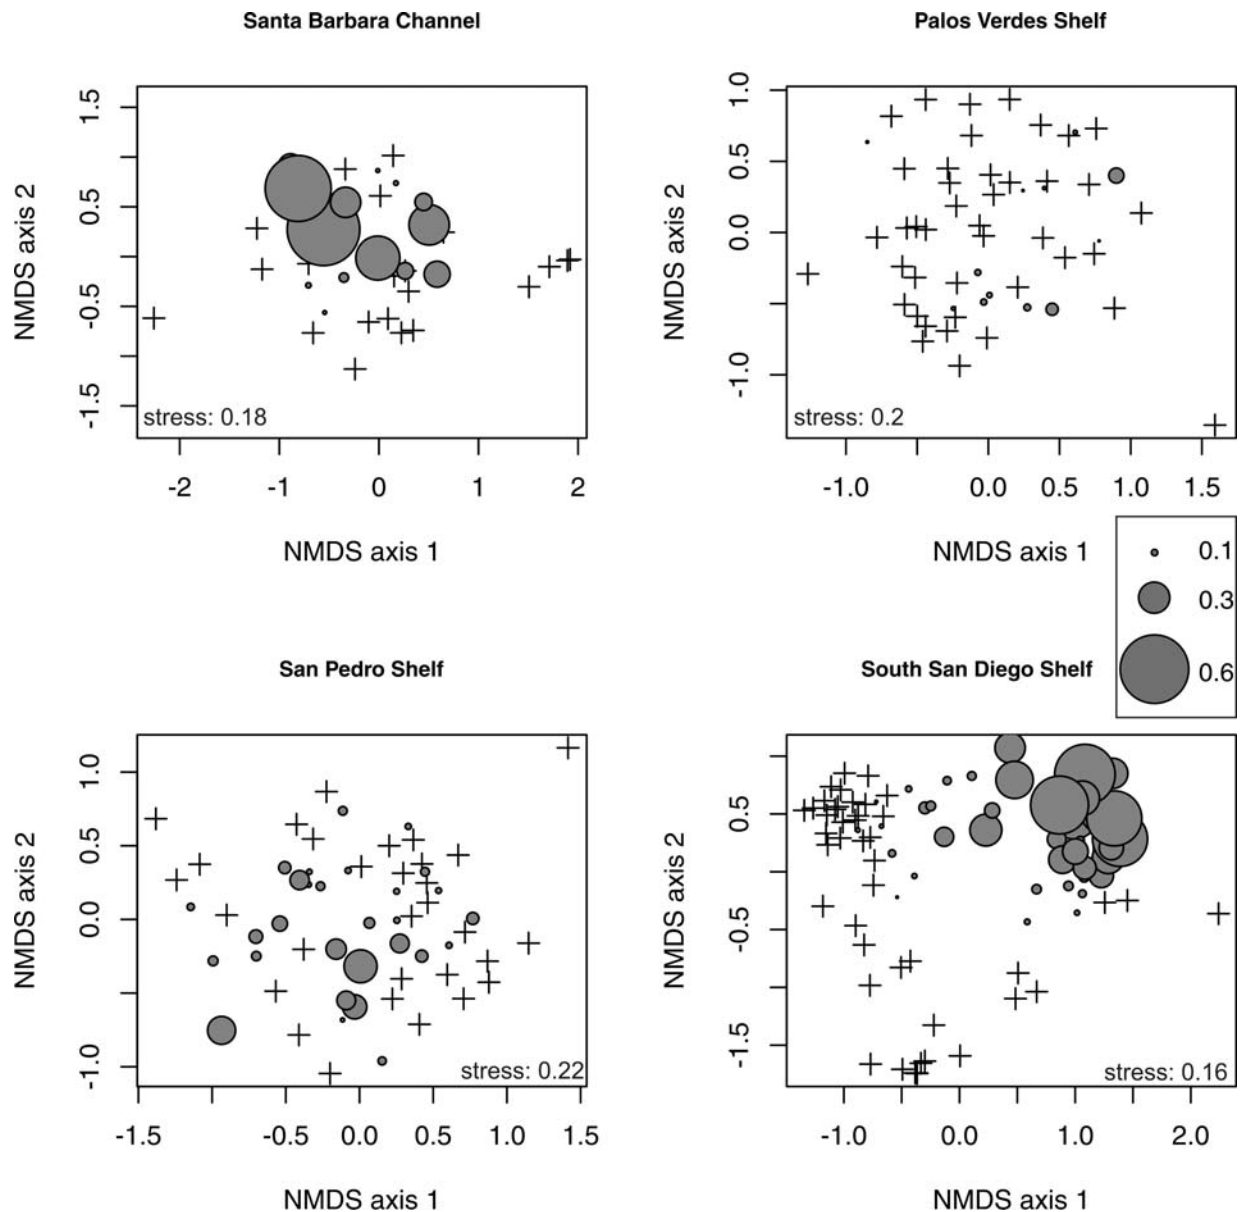

Figure DR7 – Counterpart to Figure DR6 showing spatial variation in the proportional abundance of living individuals of *Nuculana taphria*. This species attained moderate to high living abundances at some sites in three regions, but is rare at the Palos Verdes shelf relative to its living abundance in other regions and relative to its abundance in Palos Verdes death assemblages.

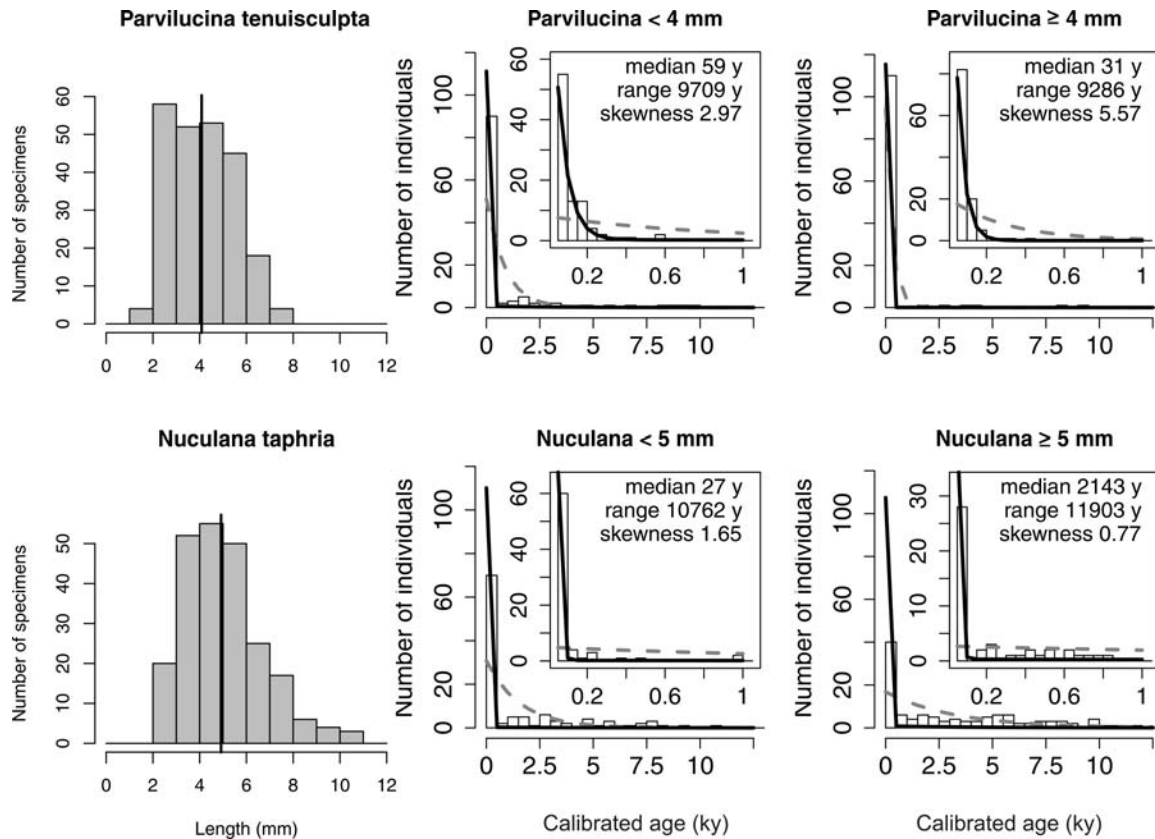

Figure DR8 - Top row: Age-frequency distributions of small (< 4 mm) and large specimens (≥ 4 mm) of *Parvilucina tenuisculpta* have similar medians and age ranges; specimen age and valve length are negatively rank-correlated ( $\rho = -0.26$ ,  $p < 0.0001$ ), contrary to an expectation that larger shells have higher preservation potential. Bottom row: In contrast, the median age of large (≥ 5 mm) specimens of *Nuculana taphria* is larger than that of small specimens, and specimen age and valve length are significantly positively correlated ( $\rho = 0.38$ ,  $p < 0.0001$ ). All four AFDs nonetheless show Akaike weights that strongly support the two-phase model (solid black line), indicating that the L-shaped distributions are unrelated to the difference in durability suggested by the *Nuculana* specimens.

**Part II. Excel file with raw data on shell ages (Table DR6)**

Amino acid racemization data and estimated calendar ages based on radiocarbon calibration. This file will be appended as an excel file, to be briefly embargoed so that we can publish further results on spatial patterns.
